# Supplementary material for: Asymmetric {Dy4} metallogrid and double-layered {Dy8} cage clusters from carboxylic decorated o-vanillin Schiff bases: syntheses, topological variation, and single molecule magnet behaviors
Source: Royal Society of Chemistry journal article supplement (doi:10.1039/d2nj04701b), 2022-12-22
Supplement: d2nj04701b1.pdf [file d2nj04701b1.pdf]

## Supporting Information for

# Asymmetric {Dy<sub>4</sub>} Metallogrid and Double-Layered {Dy<sub>8</sub>} Cage Clusters from Carboxylic Decorated *o*-vanillin Schiff Bases: Syntheses, Topological Variation, and Single Molecule Magnet Behaviors

Yi-Han Wang,<sup>†</sup> Yu Qin,<sup>†</sup> Shen Tang, Qing-Hu Teng,\* Meng-Meng Zhu, Song Peng, Kai Wang\* and  
Fu-Pei Liang\*

### Table of Contents:

1. **Fig. S1.** ORTEP diagrams of **1** and **2**.
2. **Fig. S2.** A comparison between the coordination modes of the ligands in **1** and **2**.
3. **Fig. S3.** PXRD patterns of **1** and **2**.
4. **Table S1.** Continuous Shape Measures calculation for Dy<sup>III</sup> ions of **1**.
5. **Table S2.** Continuous Shape Measures calculation for Dy<sup>III</sup> ions of **2**.
6. **Fig. S4.** Frequency-dependent  $\chi''$  signals of **1** recorded at 2 K and under different dc fields.
7. **Fig. S5.** Temperature dependence of the in-phase  $\chi'T$  product and  $\chi''$  for **1** under zero fields.
8. **Fig. S6.** Frequency-dependent  $\chi''$  signals of **2** recorded at 2 K and under different dc fields.
9. **Table S3.** Fitting of the Cole-Cole plots of **1** under 0.4 kOe dc field.
10. **Table S4.** Fitting of the Cole-Cole plots of **2** under 0.4 kOe dc field.
11. **Table S5.** Crystal data and structure refinement parameters of **1** and **2**.
12. **Table S6.** Selected bond length and bond angle of **1**.
13. **Table S7.** Selected bond length and bond angle of **2**.

---

Guangxi Key Laboratory of Electrochemical and Magnetochemical Functional Materials, College of Chemistry and Bioengineering, Guilin University of Technology, Guilin, 541004, China.

Corresponding authors: [kaiwang@glut.edu.cn](mailto:kaiwang@glut.edu.cn) (K. Wang); [liangfupei@glut.edu.cn](mailto:liangfupei@glut.edu.cn) (F. P. Liang);  
[2020130@glut.edu.cn](mailto:2020130@glut.edu.cn) (Q. H. Teng)

<sup>†</sup>These authors contributed equally to this work.

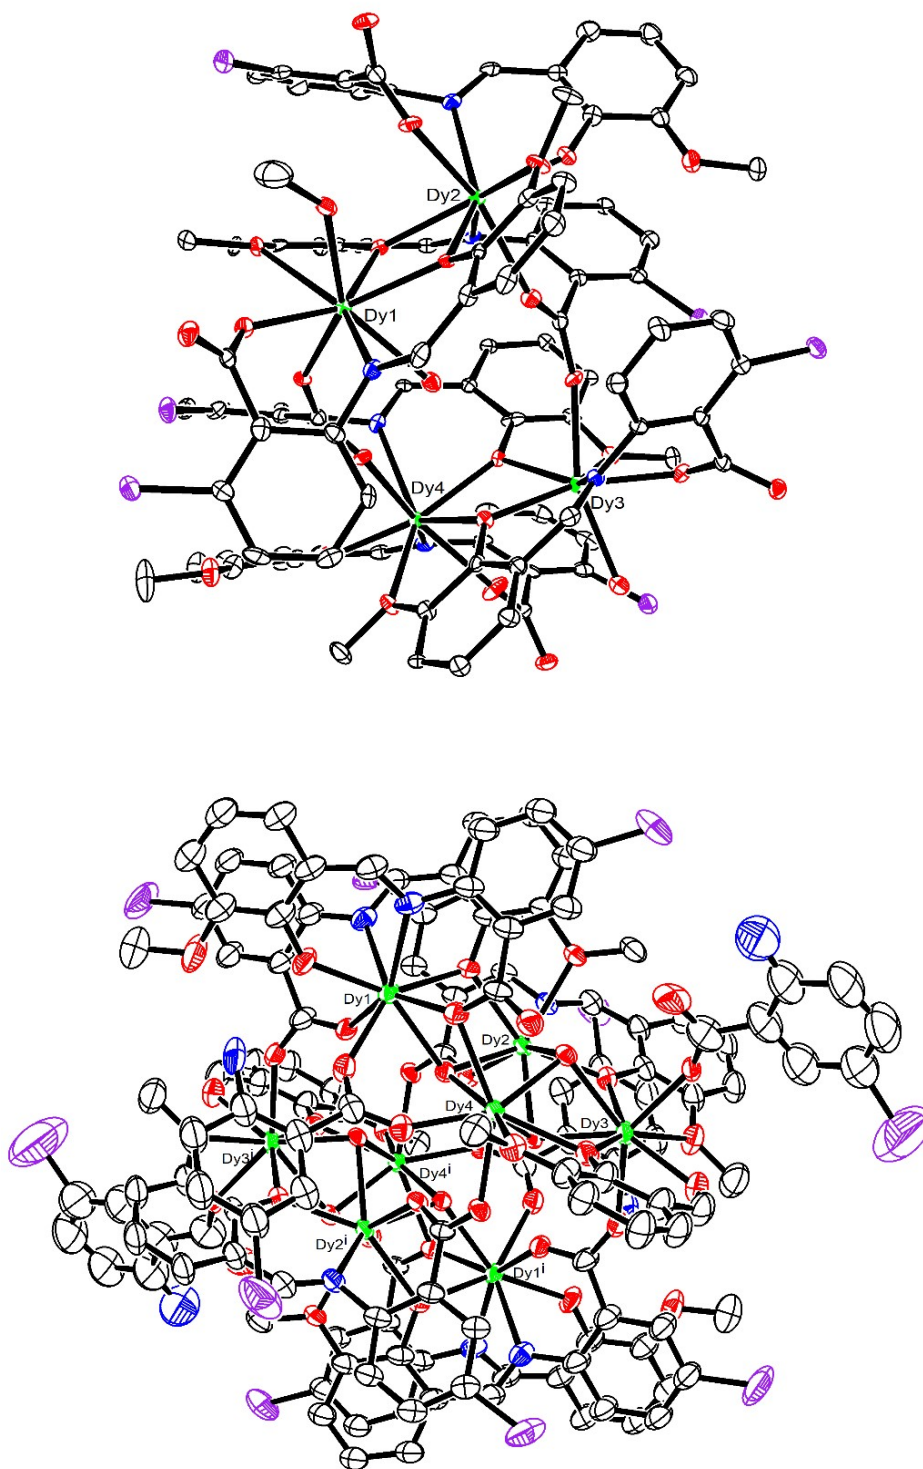

**Fig. S1.** ORTEP diagrams of **1** (up) and **2** (down) with the atoms numbering scheme (30% ellipsoid level). Hydrogen atoms and solvent molecules have been omitted for the sake of clarity. [Symmetry code:(i)  $-x+2, -y+2, -z+1$ ].

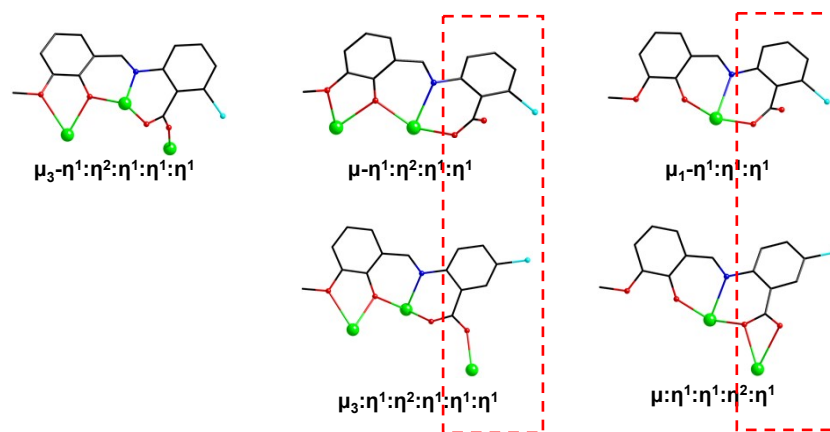

**Fig. S2.** A comparison between the coordination modes of the ligands in **1** and **2**.

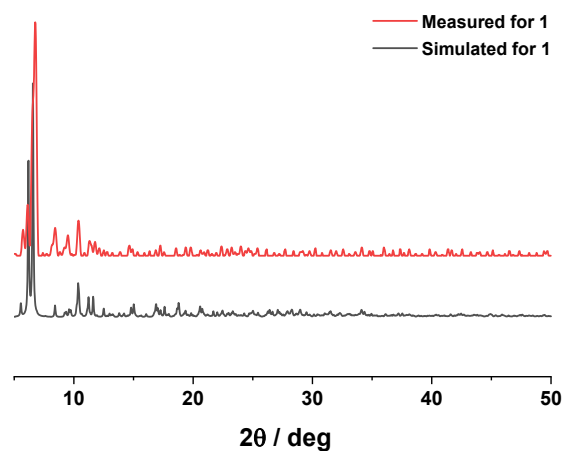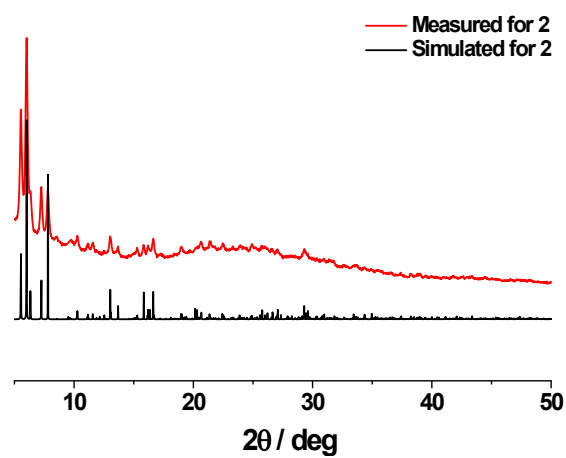

**Fig. S3.** PXRD patterns of **1** and **2**.

**Table S1.** Continuous Shape Measures calculation for Dy<sup>III</sup> ions of **1**.

| Ln ions         | Label           | Symmetry                   | Shape                                      | ABOXY        |
|-----------------|-----------------|----------------------------|--------------------------------------------|--------------|
| Dy1 in <b>1</b> | OP-8            | $D_{8h}$                   | Octagon                                    | 31.143       |
|                 | HPY-8           | $C_{7v}$                   | Heptagonal pyramid                         | 23.222       |
|                 | HBPY-8          | $D_{6h}$                   | Hexagonal bipyramid                        | 15.047       |
|                 | CU-8            | $O_h$                      | Cube                                       | 11.375       |
|                 | SAPR-8          | $D_{4d}$                   | Square antiprism                           | 2.106        |
|                 | <b>TDD-8</b>    | <b><math>D_{2d}</math></b> | <b>Triangular dodecahedron</b>             | <b>1.161</b> |
|                 | JGBF-8          | $D_{2d}$                   | Johnson gyrobifastigium J26                | 12.006       |
|                 | JETBPY-8        | $D_{3h}$                   | Johnson elongated triangular bipyramid J14 | 27.205       |
|                 | JBTPR-8         | $C_{2v}$                   | Biaugmented trigonal prism J50             | 2.021        |
|                 | BTPR-8          | $C_{2v}$                   | Biaugmented trigonal prism                 | 1.446        |
|                 | JSD-8           | $D_{2d}$                   | Snub diphenoid J84                         | 3.279        |
|                 | TT-8            | $T_d$                      | Triakis tetrahedron                        | 12.036       |
|                 | ETBPY-8         | $D_{3h}$                   | Elongated trigonal bipyramid               | 24.139       |
|                 | Dy2 in <b>1</b> | OP-8                       | $D_{8h}$                                   | Octagon      |
| HPY-8           |                 | $C_{7v}$                   | Heptagonal pyramid                         | 22.867       |
| HBPY-8          |                 | $D_{6h}$                   | Hexagonal bipyramid                        | 13.122       |
| CU-8            |                 | $O_h$                      | Cube                                       | 7.514        |
| SAPR-8          |                 | $D_{4d}$                   | Square antiprism                           | 2.546        |
| <b>TDD-8</b>    |                 | <b><math>D_{2d}</math></b> | <b>Triangular dodecahedron</b>             | <b>1.262</b> |
| JGBF-8          |                 | $D_{2d}$                   | Johnson gyrobifastigium J26                | 12.725       |
| JETBPY-8        |                 | $D_{3h}$                   | Johnson elongated triangular bipyramid J14 | 26.350       |
| JBTPR-8         |                 | $C_{2v}$                   | Biaugmented trigonal prism J50             | 2.343        |
| BTPR-8          |                 | $C_{2v}$                   | Biaugmented trigonal prism                 | 2.013        |
| JSD-8           |                 | $D_{2d}$                   | Snub diphenoid J84                         | 4.652        |
| TT-8            |                 | $T_d$                      | Triakis tetrahedron                        | 8.128        |
| ETBPY-8         |                 | $D_{3h}$                   | Elongated trigonal bipyramid               | 24.778       |
| Dy3 in <b>1</b> |                 | HP-7                       | $D_{7h}$                                   | Heptagon     |
|                 | HPY-7           | $C_{6v}$                   | Heptagonal pyramid                         | 21.647       |
|                 | PBPY-7          | $D_{5h}$                   | Pentagonal bipyramid                       | 2.759        |
|                 | COC-7           | $C_{3v}$                   | Capped octahedron                          | 3.430        |

|          |               |          |                                            |              |
|----------|---------------|----------|--------------------------------------------|--------------|
|          | <b>CTPR-7</b> | $C_{2v}$ | <b>Capped trigonal prism</b>               | <b>2.146</b> |
|          | JPBPY-7       | $D_{5h}$ | Johnson pentagonal bipyramid J13           | 5.783        |
|          | JETPY-7       | $C_{3v}$ | Johnson elongated triangular pyramid J7    | 19.304       |
|          | OP-8          | $D_{8h}$ | Octagon                                    | 30.346       |
|          | HPY-8         | $C_{7v}$ | Heptagonal pyramid                         | 23.809       |
|          | HBPY-8        | $D_{6h}$ | Hexagonal bipyramid                        | 15.618       |
|          | CU-8          | $O_h$    | Cube                                       | 10.381       |
|          | <b>SAPR-8</b> | $D_{4d}$ | <b>Square antiprism</b>                    | <b>1.451</b> |
|          | TDD-8         | $D_{2d}$ | Triangular dodecahedron                    | 2.174        |
| Dy4 in 1 | JGBF-8        | $D_{2d}$ | Johnson gyrobifastigium J26                | 11.383       |
|          | JETBPY-8      | $D_{3h}$ | Johnson elongated triangular bipyramid J14 | 27.537       |
|          | JBTPR-8       | $C_{2v}$ | Biaugmented trigonal prism J50             | 1.960        |
|          | BTPR-8        | $C_{2v}$ | Biaugmented trigonal prism                 | 1.672        |
|          | JSD-8         | $D_{2d}$ | Snub diphenoid J84                         | 2.877        |
|          | TT-8          | $T_d$    | Triakis tetrahedron                        | 10.957       |
|          | ETBPY-8       | $D_{3h}$ | Elongated trigonal bipyramid               | 22.515       |

**Table S2.** Continuous Shape Measures calculation for Dy<sup>III</sup> ions of **2**.

| Ln ions         | Label         | Symmetry                   | Shape                                      | ABOXY        |
|-----------------|---------------|----------------------------|--------------------------------------------|--------------|
| Dy1 in <b>2</b> | OP-8          | $D_{8h}$                   | Octagon                                    | 31.559       |
|                 | HPY-8         | $C_{7v}$                   | Heptagonal pyramid                         | 22.834       |
|                 | HBPY-8        | $D_{6h}$                   | Hexagonal bipyramid                        | 15.197       |
|                 | CU-8          | $O_h$                      | Cube                                       | 9.908        |
|                 | SAPR-8        | $D_{4d}$                   | Square antiprism                           | 1.734        |
|                 | TDD-8         | $D_{2d}$                   | Triangular dodecahedron                    | 1.647        |
|                 | JGBF-8        | $D_{2d}$                   | Johnson gyrobifastigium J26                | 13.711       |
|                 | JETBPY-8      | $D_{3h}$                   | Johnson elongated triangular bipyramid J14 | 29.067       |
|                 | JBTPR-8       | $C_{2v}$                   | Biaugmented trigonal prism J50             | 1.727        |
|                 | <b>BTPR-8</b> | <b><math>C_{2v}</math></b> | <b>Biaugmented trigonal prism</b>          | <b>1.264</b> |
|                 | JSD-8         | $D_{2d}$                   | Snub diphenoid J84                         | 3.590        |
|                 | TT-8          | $T_d$                      | Triakis tetrahedron                        | 10.167       |
|                 | ETBPY-8       | $D_{3h}$                   | Elongated trigonal bipyramid               | 23.252       |
| Dy2 in <b>2</b> | OP-8          | $D_{8h}$                   | Octagon                                    | 30.807       |
|                 | HPY-8         | $C_{7v}$                   | Heptagonal pyramid                         | 22.757       |
|                 | HBPY-8        | $D_{6h}$                   | Hexagonal bipyramid                        | 13.598       |
|                 | CU-8          | $O_h$                      | Cube                                       | 12.229       |
|                 | SAPR-8        | $D_{4d}$                   | Square antiprism                           | 3.005        |
|                 | <b>TDD-8</b>  | <b><math>D_{2d}</math></b> | <b>Triangular dodecahedron</b>             | <b>2.351</b> |
|                 | JGBF-8        | $D_{2d}$                   | Johnson gyrobifastigium J26                | 8.565        |
|                 | JETBPY-8      | $D_{3h}$                   | Johnson elongated triangular bipyramid J14 | 26.846       |
|                 | JBTPR-8       | $C_{2v}$                   | Biaugmented trigonal prism J50             | 3.415        |
|                 | BTPR-8        | $C_{2v}$                   | Biaugmented trigonal prism                 | 3.057        |
|                 | JSD-8         | $D_{2d}$                   | Snub diphenoid J84                         | 3.350        |
|                 | TT-8          | $T_d$                      | Triakis tetrahedron                        | 12.805       |
|                 | ETBPY-8       | $D_{3h}$                   | Elongated trigonal bipyramid               | 20.938       |
| Dy3 in <b>2</b> | OP-8          | $D_{8h}$                   | Octagon                                    | 29.922       |
|                 | HPY-8         | $C_{7v}$                   | Heptagonal pyramid                         | 20.814       |
|                 | HBPY-8        | $D_{6h}$                   | Hexagonal bipyramid                        | 14.925       |

|          |              |                            |                                            |              |
|----------|--------------|----------------------------|--------------------------------------------|--------------|
|          | CU-8         | $O_h$                      | Cube                                       | 9.576        |
|          | SAPR-8       | $D_{4d}$                   | Square antiprism                           | 1.941        |
|          | <b>TDD-8</b> | <b><math>D_{2d}</math></b> | <b>Triangular dodecahedron</b>             | <b>1.055</b> |
|          | JGBF-8       | $D_{2d}$                   | Johnson gyrobifastigium J26                | 14.394       |
|          | JETBPY-8     | $D_{3h}$                   | Johnson elongated triangular bipyramid J14 | 28.484       |
|          | JBTPR-8      | $C_{2v}$                   | Biaugmented trigonal prism J50             | 2.202        |
|          | BTPR-8       | $C_{2v}$                   | Biaugmented trigonal prism                 | 1.896        |
|          | JSD-8        | $D_{2d}$                   | Snub diphenoid J84                         | 3.207        |
|          | TT-8         | $T_d$                      | Triakis tetrahedron                        | 10.268       |
|          | ETBPY-8      | $D_{3h}$                   | Elongated trigonal bipyramid               | 24.091       |
|          | EP-9         | $D_{9h}$                   | Enneagon                                   | 32.042       |
|          | OPY-9        | $C_{8v}$                   | Octagonal pyramid                          | 22.970       |
|          | HBPY-9       | $D_{7h}$                   | Heptagonal bipyramid                       | 13.765       |
|          | JTC-9        | $C_{3v}$                   | Johnson triangular cupola J3               | 14.762,      |
|          | JCCU-9       | $C_{4v}$                   | Capped cube J8                             | 7.353        |
|          | CCU-9        | $C_{4v}$                   | Spherical-relaxed capped cube              | 6.352        |
| Dy4 in 2 | JCSAPR-9     | $C_{4v}$                   | Capped square antiprism J10                | 3.359        |
|          | CSAPR-9      | $C_{4v}$                   | Spherical capped square antiprism          | 2.686        |
|          | JTCTPR-9     | $D_{3h}$                   | Tricapped trigonal prism J51               | 4.794        |
|          | TCTPR-9      | $D_{3h}$                   | Spherical tricapped trigonal prism         | 3.585        |
|          | JTDIC-9      | $C_{3v}$                   | Tridiminished icosahedron J63              | 12.235       |
|          | HH-9         | $C_{2v}$                   | Hula-hoop                                  | 9.642        |
|          | <b>MFF-9</b> | <b><math>C_s</math></b>    | <b>Muffin</b>                              | <b>2.294</b> |

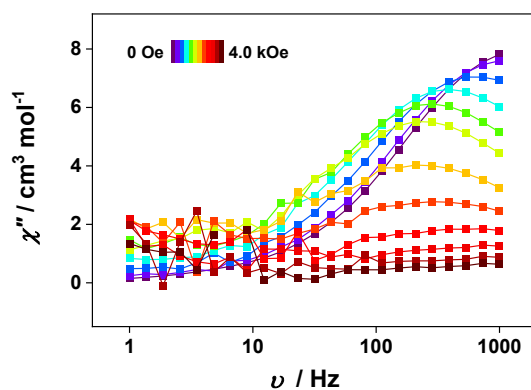

Fig. S4. Frequency-dependent  $\chi''$  signals of **1** recorded at 2 K and under different dc fields.

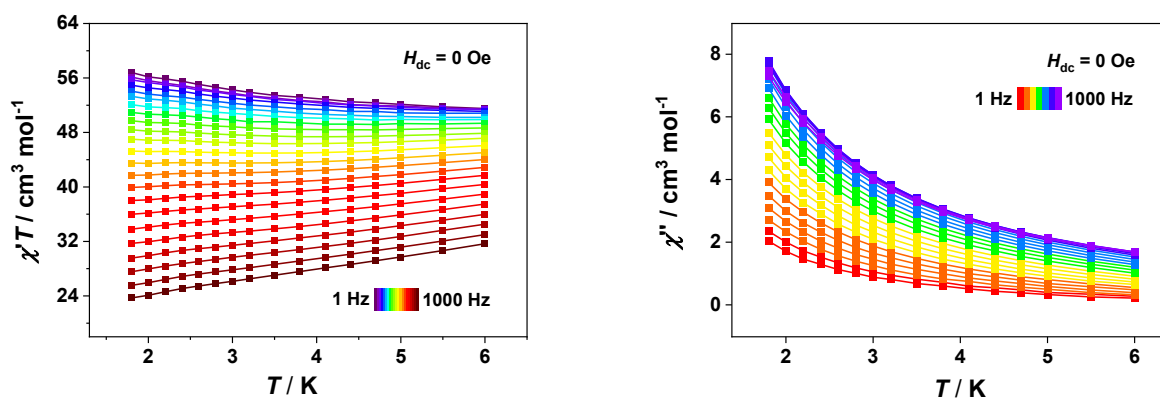

Fig. S5. Temperature dependence of the in-phase  $\chi'T$  product and  $\chi''$  for **1** under zero fields.

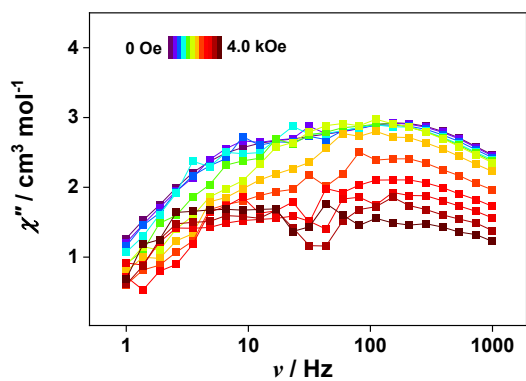

Fig. S6. Frequency-dependent  $\chi''$  signals of **2** recorded at 2 K and under different dc fields.



**Table S3.** Fitting of the Cole-Cole plots of **1** under 0.4 kOe dc field.

| T/K | $\chi_s$     | $\Delta\chi$ | $\tau$       | $\alpha$     |
|-----|--------------|--------------|--------------|--------------|
| 1.8 | 0.359659E+01 | 0.303770E+02 | 0.299916E-03 | 0.311713E+00 |
| 2.0 | 0.353453E+01 | 0.271117E+02 | 0.265074E-03 | 0.309108E+00 |
| 2.2 | 0.338599E+01 | 0.246036E+02 | 0.232980E-03 | 0.314158E+00 |
| 2.4 | 0.348817E+01 | 0.224427E+02 | 0.209344E-03 | 0.314070E+00 |
| 2.6 | 0.356860E+01 | 0.205582E+02 | 0.188928E-03 | 0.315556E+00 |
| 2.8 | 0.356381E+01 | 0.189735E+02 | 0.171269E-03 | 0.319834E+00 |
| 3.0 | 0.374032E+01 | 0.175679E+02 | 0.161360E-03 | 0.315186E+00 |
| 3.5 | 0.364058E+01 | 0.148331E+02 | 0.135303E-03 | 0.318627E+00 |
| 4.0 | 0.368030E+01 | 0.127909E+02 | 0.122696E-03 | 0.310706E+00 |
| 4.5 | 0.364647E+01 | 0.112301E+02 | 0.113428E-03 | 0.302057E+00 |
| 5.0 | 0.351096E+01 | 0.100002E+02 | 0.103259E-03 | 0.297658E+00 |
| 6.0 | 0.300370E+01 | 0.819962E+01 | 0.762093E-04 | 0.298894E+00 |
| 7.0 | 0.242910E+01 | 0.694418E+01 | 0.505238E-04 | 0.307293E+00 |
| 8.0 | 0.182897E+01 | 0.601892E+01 | 0.308383E-04 | 0.311773E+00 |

**Table S4.** Fitting of the Cole-Cole plots of **2** under 0.4 kOe dc field.

| T/K | $\chi_s$     | $\Delta\chi_1$ | $\tau_1$     | $\alpha_1$   |
|-----|--------------|----------------|--------------|--------------|
| 1.8 | 0.136542E+01 | 0.330408E+01   | 0.366559E-01 | 0.165752E+00 |
| 2.0 | 0.125091E+01 | 0.252791E+01   | 0.302118E-01 | 0.123823E+00 |
| 2.2 | 0.120723E+01 | 0.243355E+01   | 0.263454E-01 | 0.127765E+00 |
| 2.4 | 0.135243E+01 | 0.285573E+01   | 0.225146E-01 | 0.181201E+00 |
| 2.6 | 0.140600E+01 | 0.281767E+01   | 0.195353E-01 | 0.184120E+00 |
| 2.8 | 0.134410E+01 | 0.264017E+01   | 0.176599E-01 | 0.172498E+00 |
| 3.0 | 0.134275E+01 | 0.258565E+01   | 0.160242E-01 | 0.176916E+00 |
| 3.2 | 0.138371E+01 | 0.264889E+01   | 0.141744E-01 | 0.200240E+00 |
| 3.5 | 0.131455E+01 | 0.233859E+01   | 0.129933E-01 | 0.177014E+00 |
| 3.8 | 0.140064E+01 | 0.238164E+01   | 0.111344E-01 | 0.203146E+00 |
| 4.1 | 0.125747E+01 | 0.207162E+01   | 0.105209E-01 | 0.179353E+00 |
| 4.4 | 0.163716E+01 | 0.230019E+01   | 0.864377E-02 | 0.218943E+00 |
| 4.7 | 0.134727E+01 | 0.185364E+01   | 0.867885E-02 | 0.165754E+00 |
| 5.0 | 0.112482E+01 | 0.186363E+01   | 0.770761E-02 | 0.203309E+00 |

|     |              |              |              |              |
|-----|--------------|--------------|--------------|--------------|
| 5.4 | 0.119085E+01 | 0.164856E+01 | 0.706479E-02 | 0.170200E+00 |
| 5.8 | 0.966362E+00 | 0.163311E+01 | 0.601051E-02 | 0.200021E+00 |
| 6.2 | 0.694793E+00 | 0.154333E+01 | 0.522939E-02 | 0.205255E+00 |
| 6.6 | 0.755223E+00 | 0.136756E+01 | 0.471187E-02 | 0.169387E+00 |
| 7.0 | 0.900133E+00 | 0.129315E+01 | 0.398185E-02 | 0.167085E+00 |
| 7.5 | 0.884007E+00 | 0.125243E+01 | 0.331527E-02 | 0.167107E+00 |
| 8.0 | 0.169865E+01 | 0.119067E+01 | 0.281320E-02 | 0.166306E+00 |
| 8.5 | 0.179844E+01 | 0.115082E+01 | 0.234090E-02 | 0.177702E+00 |
| 9.0 | 0.203777E+01 | 0.107411E+01 | 0.195524E-02 | 0.160700E+00 |

| $\Delta\chi_2$ | $\tau_2$     | $\alpha_2$   |
|----------------|--------------|--------------|
| 0.153973E+02   | 0.963265E-03 | 0.527468E+00 |
| 0.144891E+02   | 0.808520E-03 | 0.535240E+00 |
| 0.132097E+02   | 0.632851E-03 | 0.532925E+00 |
| 0.113862E+02   | 0.459220E-03 | 0.510243E+00 |
| 0.102836E+02   | 0.376127E-03 | 0.500482E+00 |
| 0.956269E+01   | 0.315175E-03 | 0.498529E+00 |
| 0.880150E+01   | 0.266351E-03 | 0.492584E+00 |
| 0.795007E+01   | 0.220779E-03 | 0.478610E+00 |
| 0.738200E+01   | 0.188483E-03 | 0.481790E+00 |
| 0.641436E+01   | 0.152091E-03 | 0.458055E+00 |
| 0.616497E+01   | 0.131200E-03 | 0.470779E+00 |
| 0.492099E+01   | 0.116724E-03 | 0.405905E+00 |
| 0.513207E+01   | 0.102372E-03 | 0.449182E+00 |
| 0.488150E+01   | 0.739770E-04 | 0.449135E+00 |
| 0.447170E+01   | 0.673003E-04 | 0.447437E+00 |
| 0.422436E+01   | 0.449505E-04 | 0.440105E+00 |
| 0.416494E+01   | 0.298391E-04 | 0.448097E+00 |
| 0.388112E+01   | 0.256984E-04 | 0.452902E+00 |
| 0.345727E+01   | 0.223441E-04 | 0.439009E+00 |
| 0.314679E+01   | 0.160052E-04 | 0.421525E+00 |
| 0.207370E+01   | 0.254759E-04 | 0.378880E+00 |
| 0.173476E+01   | 0.227249E-04 | 0.357384E+00 |
| 0.130747E+01   | 0.273152E-04 | 0.322711E+00 |

**Table S5.** Crystal data and structure refinement parameters of **1** and **2**.

| <b>Clusters</b>                                                               | <b>1</b>                                                                                       | <b>2</b>                                                                                           |
|-------------------------------------------------------------------------------|------------------------------------------------------------------------------------------------|----------------------------------------------------------------------------------------------------|
| Empirical formula                                                             | C <sub>99</sub> H <sub>97</sub> Cl <sub>6</sub> Dy <sub>4</sub> N <sub>7</sub> O <sub>34</sub> | C <sub>140</sub> H <sub>118</sub> Cl <sub>10</sub> Dy <sub>8</sub> N <sub>10</sub> O <sub>50</sub> |
| Crystal system                                                                | monoclinic                                                                                     | triclinic                                                                                          |
| Space group                                                                   | <i>P</i> 2 <sub>1</sub> / <i>c</i>                                                             | <i>P</i> $\bar{1}$                                                                                 |
| <i>a</i> /Å                                                                   | 29.0219(7)                                                                                     | 15.3953(5)                                                                                         |
| <i>b</i> /Å                                                                   | 19.1466(5)                                                                                     | 16.5545(5)                                                                                         |
| <i>c</i> /Å                                                                   | 19.2115(5)                                                                                     | 17.4986(6)                                                                                         |
| $\alpha$ /°                                                                   | 90                                                                                             | 67.554(3)                                                                                          |
| $\beta$ /°                                                                    | 100.539(3)                                                                                     | 89.584(3)                                                                                          |
| $\gamma$ /°                                                                   | 90                                                                                             | 74.827(3)                                                                                          |
| <i>V</i> /Å <sup>3</sup>                                                      | 10495.2(5)                                                                                     | 3956.7(3)                                                                                          |
| <i>Z</i>                                                                      | 4                                                                                              | 1                                                                                                  |
| $\rho_{\text{calc}}$ /cm <sup>3</sup>                                         | 1.754                                                                                          | 1.764                                                                                              |
| $\mu$ /mm <sup>-1</sup>                                                       | 3.052                                                                                          | 3.973                                                                                              |
| <i>F</i> (000)                                                                | 5464.0                                                                                         | 2018.0                                                                                             |
| 2 $\theta$ range /°                                                           | 6.67 to 52                                                                                     | 6.666 to 50                                                                                        |
| Reflections collected                                                         | 70408                                                                                          | 28516                                                                                              |
| Independent reflections                                                       | 20583                                                                                          | 13891                                                                                              |
| <i>R</i> <sub>int</sub>                                                       | 0.0732                                                                                         | 0.0390                                                                                             |
| Data/restraints/parameters                                                    | 20583/33/1363                                                                                  | 13891/1862/913                                                                                     |
| Goodness-of-fit on <i>F</i> <sup>2</sup>                                      | 1.167                                                                                          | 1.112                                                                                              |
| <i>R</i> <sub>1</sub> , <i>wR</i> <sub>2</sub> [ <i>I</i> >= 2 ( <i>I</i> ) ] | 0.0775, 0.1539                                                                                 | 0.0546, 0.1445                                                                                     |
| <i>R</i> <sub>1</sub> , <i>wR</i> <sub>2</sub> [all data]                     | 0.1089, 0.1732                                                                                 | 0.0814, 0.1591                                                                                     |

**Table S6.** Selected bond length and bond angle of **1**.

| <b>Bond</b>       | <b>Length/Å</b>  | <b>Bond</b>       | <b>Length/Å</b>  | <b>Bond</b>       | <b>Length/Å</b>  |
|-------------------|------------------|-------------------|------------------|-------------------|------------------|
| Dy1—O2            | 2.259 (8)        | Dy2—O11           | 2.167 (8)        | Dy3—N2            | 2.437 (10)       |
| Dy1—O3            | 2.353 (7)        | Dy2—O14           | 2.369 (8)        | Dy4—O7            | 2.425 (8)        |
| Dy1—O15           | 2.325 (7)        | Dy2—O15           | 2.312 (7)        | Dy4—O8            | 2.507 (8)        |
| Dy1—O16           | 2.540 (8)        | Dy2—N3            | 2.530 (10)       | Dy4—O18           | 2.349 (7)        |
| Dy1—O17           | 2.319 (7)        | Dy2—N4            | 2.539 (9)        | Dy4—O19           | 2.280 (8)        |
| Dy1—O25           | 2.420 (8)        | Dy3—O6            | 2.237 (8)        | Dy4—O22           | 2.292 (8)        |
| Dy1—O26           | 2.377 (8)        | Dy3—O7            | 2.267 (7)        | Dy4—O23           | 2.152 (8)        |
| Dy1—N1            | 2.439 (10)       | Dy3—O13           | 2.231 (8)        | Dy4—N5            | 2.532 (10)       |
| Dy2—O3            | 2.395 (7)        | Dy3—O19           | 2.311 (8)        | Dy4—N6            | 2.556 (10)       |
| Dy2—O4            | 2.467 (8)        | Dy3—O20           | 2.447 (7)        |                   |                  |
| Dy2—O10           | 2.372 (8)        | Dy3—O27           | 2.338 (9)        |                   |                  |
| <b>Bond Angle</b> | <b>Angle (°)</b> | <b>Bond Angle</b> | <b>Angle (°)</b> | <b>Bond Angle</b> | <b>Angle (°)</b> |
| O2—Dy1—O3         | 134.2 (3)        | O10—Dy2—N3        | 71.2 (3)         | O13—Dy3—N2        | 82.1 (3)         |
| O2—Dy1—O15        | 139.0 (3)        | O10—Dy2—N4        | 133.9 (3)        | O19—Dy3—O20       | 65.7 (3)         |
| O2—Dy1—O16        | 75.7 (3)         | O11—Dy2—O3        | 132.2 (3)        | O19—Dy3—O27       | 116.3 (3)        |
| O2—Dy1—O17        | 85.3 (3)         | O11—Dy2—O4        | 73.7 (3)         | O19—Dy3—N2        | 135.9 (3)        |
| O2—Dy1—O25        | 129.8 (3)        | O11—Dy2—O10       | 113.3 (3)        | O27—Dy3—O20       | 91.9 (3)         |
| O2—Dy1—O26        | 76.2 (3)         | O11—Dy2—O14       | 85.6 (3)         | O27—Dy3—N2        | 94.8 (3)         |
| O2—Dy1—N1         | 72.9 (3)         | O11—Dy2—O15       | 152.7 (3)        | N2—Dy3—O20        | 147.8 (3)        |
| O3—Dy1—O16        | 123.3 (2)        | O11—Dy2—N3        | 71.8 (3)         | O7—Dy4—O8         | 65.5 (3)         |
| O3—Dy1—O25        | 69.5 (3)         | O11—Dy2—N4        | 83.3 (3)         | O7—Dy4—N5         | 122.0 (3)        |
| O3—Dy1—O26        | 69.8 (3)         | O14—Dy2—O3        | 74.2 (3)         | O7—Dy4—N6         | 138.1 (3)        |
| O3—Dy1—N1         | 76.8 (3)         | O14—Dy2—O4        | 94.2 (3)         | O8—Dy4—N5         | 142.9 (3)        |
| O15—Dy1—O3        | 72.4 (3)         | O14—Dy2—O10       | 149.3 (3)        | O8—Dy4—N6         | 122.4 (3)        |
| O15—Dy1—O16       | 63.3 (2)         | O14—Dy2—N3        | 139.4 (3)        | O18—Dy4—O7        | 74.9 (3)         |
| O15—Dy1—O25       | 85.0 (3)         | O14—Dy2—N4        | 69.4 (3)         | O18—Dy4—O8        | 80.4 (3)         |
| O15—Dy1—O26       | 91.3 (3)         | O15—Dy2—O3        | 71.9 (2)         | O18—Dy4—N5        | 68.7 (3)         |
| O15—Dy1—N1        | 147.0 (3)        | O15—Dy2—O4        | 133.6 (3)        | O18—Dy4—N6        | 143.7 (3)        |
| O17—Dy1—O3        | 137.9 (3)        | O15—Dy2—O10       | 82.6 (3)         | O19—Dy4—O7        | 70.7 (3)         |
| O17—Dy1—O15       | 85.9 (3)         | O15—Dy2—O14       | 90.8 (3)         | O19—Dy4—O8        | 134.8 (3)        |
| O17—Dy1—O16       | 73.1 (3)         | O15—Dy2—N3        | 94.4 (3)         | O19—Dy4—O18       | 99.0 (3)         |
| O17—Dy1—O25       | 73.1 (3)         | O15—Dy2—N4        | 70.1 (3)         | O19—Dy4—O22       | 76.8 (3)         |
| O17—Dy1—O26       | 148.2 (3)        | N3—Dy2—N4         | 74.6 (3)         | O19—Dy4—N5        | 72.3 (3)         |
| O17—Dy1—N1        | 110.1 (3)        | O6—Dy3—O7         | 144.6 (3)        | O19—Dy4—N6        | 84.1 (3)         |

|             |           |             |           |             |           |
|-------------|-----------|-------------|-----------|-------------|-----------|
| O25—Dy1—O16 | 134.7 (3) | O6—Dy3—O19  | 142.3 (3) | O22—Dy4—O7  | 71.1 (3)  |
| O25—Dy1—N1  | 73.2 (3)  | O6—Dy3—O20  | 78.4 (3)  | O22—Dy4—O8  | 78.9 (3)  |
| O26—Dy1—O16 | 77.4 (3)  | O6—Dy3—O27  | 74.4 (3)  | O22—Dy4—O18 | 145.1 (3) |
| O26—Dy1—O25 | 138.2 (3) | O6—Dy3—N2   | 73.3 (3)  | O22—Dy4—N5  | 138.0 (3) |
| O26—Dy1—N1  | 89.1 (3)  | O7—Dy3—O19  | 73.0 (3)  | O22—Dy4—N6  | 70.9 (3)  |
| N1—Dy1—O16  | 148.0 (3) | O7—Dy3—O20  | 136.1 (3) | O23—Dy4—O7  | 139.3 (3) |
| O3—Dy2—O4   | 65.4 (3)  | O7—Dy3—O27  | 93.2 (3)  | O23—Dy4—O8  | 75.3 (3)  |
| O3—Dy2—N3   | 145.1 (3) | O7—Dy3—N2   | 74.9 (3)  | O23—Dy4—O18 | 89.0 (3)  |
| O3—Dy2—N4   | 126.0 (3) | O13—Dy3—O6  | 85.3 (3)  | O23—Dy4—O19 | 149.7 (3) |
| O4—Dy2—N3   | 110.4 (3) | O13—Dy3—O7  | 105.5 (3) | O23—Dy4—O22 | 112.3 (4) |
| O4—Dy2—N4   | 152.8 (3) | O13—Dy3—O19 | 78.2 (3)  | O23—Dy4—N5  | 83.8 (3)  |
| O10—Dy2—O3  | 75.3 (3)  | O13—Dy3—O20 | 80.7 (3)  | O23—Dy4—N6  | 72.8 (3)  |
| O10—Dy2—O4  | 70.2 (3)  | O13—Dy3—O27 | 159.4 (3) | N5—Dy4—N6   | 78.1 (3)  |

---

**Table S7.** Selected bond length and bond angle of **2**.

| <b>Bond</b>       | <b>Length/Å</b>  | <b>Bond</b>              | <b>Length/Å</b>  | <b>Bond</b>              | <b>Length/Å</b>  |
|-------------------|------------------|--------------------------|------------------|--------------------------|------------------|
| Dy1—O2            | 2.358 (6)        | Dy2—O11                  | 2.299 (5)        | Dy3—O21                  | 2.423 (5)        |
| Dy1—O3            | 2.222 (6)        | Dy2—O20                  | 2.331 (5)        | Dy3—O22                  | 2.282 (5)        |
| Dy1—O6            | 2.331 (6)        | Dy2—O21                  | 2.297 (5)        | Dy4—O1                   | 2.718 (7)        |
| Dy1—O7            | 2.358 (6)        | Dy2—O22                  | 2.426 (5)        | Dy4—O2                   | 2.458 (6)        |
| Dy1—O13           | 2.340 (7)        | Dy2—N3                   | 2.502 (7)        | Dy4—O9 <sup>i</sup>      | 2.330 (6)        |
| Dy1—O20           | 2.354 (5)        | Dy3—O5 <sup>i</sup>      | 2.310 (7)        | Dy4—O14                  | 2.335 (6)        |
| Dy1—N1            | 2.553 (8)        | Dy3—O11                  | 2.407 (6)        | Dy4—O18                  | 2.390 (6)        |
| Dy1—N2            | 2.552 (8)        | Dy3—O12                  | 2.517 (6)        | Dy4—O19                  | 2.541 (6)        |
| Dy2—O7            | 2.352 (6)        | Dy3—O15                  | 2.244 (6)        | Dy4—O20                  | 2.388 (5)        |
| Dy2—O8            | 2.583 (6)        | Dy3—O17                  | 2.408 (7)        | Dy4—O21                  | 2.374 (5)        |
| Dy2—O10           | 2.300 (6)        | Dy3—O18                  | 2.327 (6)        | Dy4—O22                  | 2.472 (5)        |
| <b>Bond Angle</b> | <b>Angle (°)</b> | <b>Bond Angle</b>        | <b>Angle (°)</b> | <b>Bond Angle</b>        | <b>Angle (°)</b> |
| O2—Dy1—O7         | 83.1 (2)         | O11—Dy2—O22              | 71.6 (2)         | O22—Dy3—O12              | 119.9 (2)        |
| O2—Dy1—N1         | 68.9 (2)         | O11—Dy2—N3               | 73.5 (2)         | O22—Dy3—O17              | 138.2 (2)        |
| O2—Dy1—N2         | 141.0 (3)        | O20—Dy2—O7               | 69.7 (2)         | O22—Dy3—O18              | 78.1 (2)         |
| O3—Dy1—O2         | 116.3 (2)        | O20—Dy2—O8               | 121.5 (2)        | O22—Dy3—O21              | 52.5 (2)         |
| O3—Dy1—O6         | 88.0 (2)         | O20—Dy2—O22              | 68.5 (2)         | O2—Dy4—O1                | 49.0 (2)         |
| O3—Dy1—O7         | 143.1 (2)        | O20—Dy2—N3               | 140.7 (2)        | O2—Dy4—O19               | 102.7 (2)        |
| O3—Dy1—O13        | 72.6 (2)         | O21—Dy2—O7               | 98.4 (2)         | O2—Dy4—O22               | 120.5 (2)        |
| O3—Dy1—O20        | 146.2 (2)        | O21—Dy2—O8               | 72.4 (2)         | O9 <sup>i</sup> —Dy4—O1  | 143.3 (2)        |
| O3—Dy1—N1         | 74.6 (3)         | O21—Dy2—O10              | 151.6 (2)        | O9 <sup>i</sup> —Dy4—O2  | 149.6 (2)        |
| O3—Dy1—N2         | 75.1 (3)         | O21—Dy2—O11              | 77.3 (2)         | O9 <sup>i</sup> —Dy4—O14 | 73.4 (2)         |
| O6—Dy1—O2         | 143.9 (2)        | O21—Dy2—O20              | 81.9 (2)         | O9 <sup>i</sup> —Dy4—O18 | 75.1 (2)         |
| O6—Dy1—O7         | 92.9 (2)         | O21—Dy2—O22              | 62.2 (2)         | O9 <sup>i</sup> —Dy4—O19 | 75.8 (2)         |
| O6—Dy1—O13        | 84.9 (2)         | O21—Dy2—N3               | 134.9 (2)        | O9 <sup>i</sup> —Dy4—O20 | 106.2 (2)        |
| O6—Dy1—O20        | 78.83 (2)        | O22—Dy2—O8               | 131.9 (2)        | O9 <sup>i</sup> —Dy4—O21 | 129.6 (2)        |
| O6—Dy1—N1         | 146.7 (2)        | O22—Dy2—N3               | 134.3 (2)        | O9 <sup>i</sup> —Dy4—O22 | 75.5 (2)         |
| O6—Dy1—N2         | 68.1 (2)         | N3—Dy2—O8                | 71.0 (2)         | O14—Dy4—O1               | 100.2 (2)        |
| O7—Dy1—N1         | 85.2 (2)         | O5 <sup>i</sup> —Dy3—O11 | 107.5 (2)        | O14—Dy4—O2               | 76.4 (2)         |
| O7—Dy1—N2         | 71.1 (2)         | O5 <sup>i</sup> —Dy3—O12 | 77.7 (3)         | O14—Dy4—O18              | 133.6 (2)        |
| O13—Dy1—O2        | 78.3 (2)         | O5 <sup>i</sup> —Dy3—O17 | 72.0 (2)         | O14—Dy4—O19              | 75.7 (2)         |
| O13—Dy1—O7        | 144.2 (2)        | O5 <sup>i</sup> —Dy3—O18 | 91.9 (2)         | O14—Dy4—O20              | 83.8 (2)         |
| O13—Dy1—O20       | 75.3 (2)         | O5 <sup>i</sup> —Dy3—O21 | 139.9 (2)        | O14—Dy4—O21              | 154.6 (2)        |
| O13—Dy1—N1        | 115.3 (2)        | O11—Dy3—O12              | 63.5 (2)         | O14—Dy4—O22              | 128.4 (2)        |

|             |           |                         |           |             |           |
|-------------|-----------|-------------------------|-----------|-------------|-----------|
| O13—Dy1—N2  | 138.2 (3) | O11—Dy3—O17             | 145.1 (2) | O18—Dy4—O1  | 85.6 (2)  |
| O20—Dy1—O2  | 66.21 (2) | O11—Dy3—O21             | 72.9 (2)  | O18—Dy4—O2  | 132.3 (2) |
| O20—Dy1—O7  | 69.23 (2) | O15—Dy3—O5 <sup>i</sup> | 140.4 (2) | O18—Dy4—O19 | 54.1 (2)  |
| O20—Dy1—N1  | 130.2 (2) | O15—Dy3—O11             | 87.0 (2)  | O18—Dy4—O22 | 73.3 (2)  |
| O20—Dy1—N2  | 126.0 (2) | O15—Dy3—O12             | 76.4 (3)  | O19—Dy4—O1  | 67.7 (2)  |
| N2—Dy1—N1   | 80.0 (2)  | O15—Dy3—O17             | 75.4 (2)  | O20—Dy4—O1  | 108.8 (2) |
| O7—Dy2—O8   | 63.6 (2)  | O15—Dy3—O18             | 99.9 (2)  | O20—Dy4—O2  | 64.1 (2)  |
| O7—Dy2—O22  | 135.8 (2) | O15—Dy3—O21             | 79.3 (2)  | O20—Dy4—O18 | 138.0 (2) |
| O7—Dy2—N3   | 88.3 (2)  | O15—Dy3—O22             | 140.2 (2) | O20—Dy4—O19 | 158.0 (2) |
| O10—Dy2—O7  | 95.2 (2)  | O17—Dy3—O12             | 82.9 (2)  | O20—Dy4—O22 | 66.8 (2)  |
| O10—Dy2—O8  | 135.9 (2) | O17—Dy3—O21             | 130.7 (2) | O21—Dy4—O1  | 69.9 (2)  |
| O10—Dy2—O20 | 79.6 (2)  | O18—Dy3—O11             | 140.2 (2) | O21—Dy4—O2  | 78.8 (2)  |
| O10—Dy2—O22 | 90.9 (2)  | O18—Dy3—O12             | 156.2 (2) | O21—Dy4—O18 | 69.9 (2)  |
| O10—Dy2—N3  | 70.1 (2)  | O18—Dy3—O17             | 73.5 (2)  | O21—Dy4—O19 | 117.1 (2) |
| O11—Dy2—O7  | 146.7 (2) | O18—Dy3—O21             | 70.1 (2)  | O21—Dy4—O20 | 79.1 (2)  |
| O11—Dy2—O8  | 83.9 (2)  | O21—Dy3—O12             | 130.6 (2) | O21—Dy4—O22 | 60.5 (2)  |
| O11—Dy2—O10 | 104.0 (2) | O22—Dy3—O5 <sup>i</sup> | 79.1 (2)  | O22—Dy4—O1  | 128.6 (2) |
| O11—Dy2—O20 | 140.0 (2) | O22—Dy3—O11             | 72.3 (2)  | O22—Dy4—O19 | 133.2 (2) |

---

Symmetry code:(i)  $-x+2, -y+2, -z+1$
